# Supplementary material
Source: ML conference proceedings conference paper supplement (https://openaccess.thecvf.com/content/ICCV2021/html/Abrahamyan_Bias_Loss_for_ICCV_2021_paper.html)
Supplement: Supplementary file 1 [file Abrahamyan_Bias_Loss_for_ICCV_2021_supplemental.zip]

Archive with 1 entries (1 files):
- 03796-supp.pdf
